# Supplementary material for: Protection against Omicron BA.2 reinfection conferred by primary Omicron or pre-Omicron infection with and without mRNA vaccination
Source: bioRxiv or medRxiv preprint supplement (doi:10.1101/2022.06.23.22276824), 2022-06-27
Supplement: Supplementary file [file media-1.pdf]

**Supplementary Material: Protection against Omicron BA.2 reinfection conferred by primary Omicron or pre-Omicron infection with and without mRNA vaccination**

Supplementary Table 1. Protection against any Omicron BA.2 reinfection and against symptomatic Omicron BA.2 reinfection associated with pre-Omicron and Omicron BA.1 primary infection (PI) with/without vaccination. .... 2

Supplementary Table 2. Protection against Omicron BA.2 reinfection induced by primary pre-Omicron or Omicron BA.1 infection with/without vaccination, by reinfection definition:  $\geq 30$ -day interval versus  $\geq 90$ -day interval between positive NAAT test results ..... 3

Supplementary Figure 1. Study population ..... 4

**Supplementary Table 1. Protection against any Omicron BA.2 reinfection and against symptomatic Omicron BA.2 reinfection associated with pre-Omicron and Omicron BA.1 primary infection (PI) with/without vaccination.**

| Infection history and vaccination status <sup>a</sup> | Any Omicron BA.2 infection     |                                           | Symptomatic Omicron BA.2 infection |                                           |
|-------------------------------------------------------|--------------------------------|-------------------------------------------|------------------------------------|-------------------------------------------|
|                                                       | Unadjusted protection (95% CI) | Adjusted protection <sup>b</sup> (95% CI) | Unadjusted protection (95% CI)     | Adjusted protection <sup>b</sup> (95% CI) |
| <b>Pre-Omicron PI</b>                                 |                                |                                           |                                    |                                           |
| Unvaccinated                                          | 36% (19, 50)                   | 38% (19, 53)                              | 49% (21, 68)                       | 51% (22, 69)                              |
| 1-dose vaccinated                                     | 27% (15, 38)                   | 56% (47, 63)                              | 73% (64, 79)                       | 74% (66, 80)                              |
| 2-dose vaccinated                                     | 48% (41, 54)                   | 69% (64, 73)                              | 80% (75, 84)                       | 81% (76, 85)                              |
| 3-dose vaccinated                                     | 51% (45, 56)                   | 70% (66, 74)                              | 81% (77, 85)                       | 83% (78, 86)                              |
| <b>Omicron BA.1 PI</b>                                |                                |                                           |                                    |                                           |
| Unvaccinated                                          | 73% (67, 78)                   | 72% (65, 78)                              | 87% (80, 91)                       | 86% (79, 91)                              |
| 1-dose vaccinated                                     | 87% (75, 94)                   | 89% (78, 95)                              | 97% (89, 99)                       | 97% (89, 99)                              |
| 2-dose vaccinated                                     | 92% (91, 94)                   | 96% (95, 96)                              | 98% (97, 98)                       | 98% (97, 98)                              |
| 3-dose vaccinated                                     | 93% (92, 94)                   | 96% (95, 97)                              | 98% (98, 99)                       | 98% (98, 99)                              |
| <b>No prior infection</b>                             |                                |                                           |                                    |                                           |
| Unvaccinated                                          | Referent                       | Referent                                  | Referent                           | Referent                                  |
| 1-dose vaccinated                                     | -9% (-39, 14)                  | 9% (-19, 31)                              | 45% (16, 64)                       | 43% (11, 63)                              |
| 2-dose vaccinated                                     | -17% (-29, -5)                 | 35% (27, 42)                              | 58% (49, 66)                       | 61% (52, 69)                              |
| 3-dose vaccinated                                     | 4% (-6, 13)                    | 46% (40, 52)                              | 67% (59, 73)                       | 70% (62, 75)                              |

<sup>b</sup> Total number of doses administered before study inclusion regardless timing with respect to prior primary infection (before and/or after primary infection)

<sup>a</sup> Logistic regression models adjusted for age, sex, type of employment, facility, indication for testing and epidemiological week. Exposures are compared to unvaccinated individuals without infection history.

Abbreviations: CI, confidence interval; PI, primary infection

**Supplementary Table 2. Protection against Omicron BA.2 reinfection induced by primary pre-Omicron or Omicron BA.1 infection with/without vaccination, by reinfection definition: ≥30-day interval versus ≥90-day interval between positive NAAT test results**

| Infection history and vaccination status <sup>a</sup> | Omicron BA.2 infection<br>≥30-day definition of reinfection |          |                                      |                                                 | Omicron BA.2 infection<br>≥90-day definition of reinfection |          |                                      |                                                 |
|-------------------------------------------------------|-------------------------------------------------------------|----------|--------------------------------------|-------------------------------------------------|-------------------------------------------------------------|----------|--------------------------------------|-------------------------------------------------|
|                                                       | Cases                                                       | Controls | Unadjusted effectiveness<br>(95% CI) | Adjusted effectiveness <sup>b</sup><br>(95% CI) | Cases                                                       | Controls | Unadjusted effectiveness<br>(95% CI) | Adjusted effectiveness <sup>b</sup><br>(95% CI) |
| <b>Pre-Omicron PI</b>                                 | 2521                                                        | 7360     |                                      |                                                 | 2521                                                        | 7360     |                                      |                                                 |
| Unvaccinated                                          | 109                                                         | 265      | 36% (19, 50)                         | 38% (19, 53)                                    | 109                                                         | 265      | 36% (18, 50)                         | 38% (18, 53)                                    |
| 1-dose vaccinated                                     | 342                                                         | 729      | 27% (15, 38)                         | 56% (47, 63)                                    | 342                                                         | 727      | 27% (14, 38)                         | 57% (48, 64)                                    |
| 2-dose vaccinated                                     | 897                                                         | 2665     | 48% (41, 54)                         | 69% (64, 73)                                    | 897                                                         | 2665     | 48% (41, 54)                         | 69% (64, 74)                                    |
| 3-dose vaccinated                                     | 1173                                                        | 3701     | 51% (45, 56)                         | 70% (66, 74)                                    | 1173                                                        | 3703     | 51% (44, 56)                         | 71% (67, 75)                                    |
| <b>Omicron BA.1 PI</b>                                | 659                                                         | 12315    |                                      |                                                 | 470                                                         | 9118     |                                      |                                                 |
| Unvaccinated                                          | 125                                                         | 727      | 73% (67, 78)                         | 72% (65, 78)                                    | 91                                                          | 604      | 77% (70, 82)                         | 73% (65, 79)                                    |
| 1-dose vaccinated                                     | 9                                                           | 109      | 87% (75, 94)                         | 89% (78, 95)                                    | 7                                                           | 84       | 87% (72, 94)                         | 87% (71, 94)                                    |
| 2-dose vaccinated                                     | 262                                                         | 5322     | 92% (91, 94)                         | 96% (95, 96)                                    | 207                                                         | 4290     | 93% (91, 94)                         | 96% (95, 96)                                    |
| 3-dose vaccinated                                     | 263                                                         | 6157     | 93% (92, 94)                         | 96% (95, 97)                                    | 165                                                         | 4140     | 94% (93, 95)                         | 96% (95, 97)                                    |
| <b>No prior infection and unvaccinated</b>            | 672                                                         | 1043     | Reference                            | Reference                                       | 672                                                         | 1049     | Reference                            | Reference                                       |

<sup>a</sup> Total number of doses administered before study inclusion regardless timing with respect to prior primary infection.

<sup>b</sup> Logistic regression models adjusted for age, sex, type of employment, facility, indication for testing and epidemiological week. Exposures are compared to unvaccinated individuals without infection history.

Abbreviations: CI, confidence interval; NAAT, nucleic acid amplification test

## Supplementary Figure 1. Study population

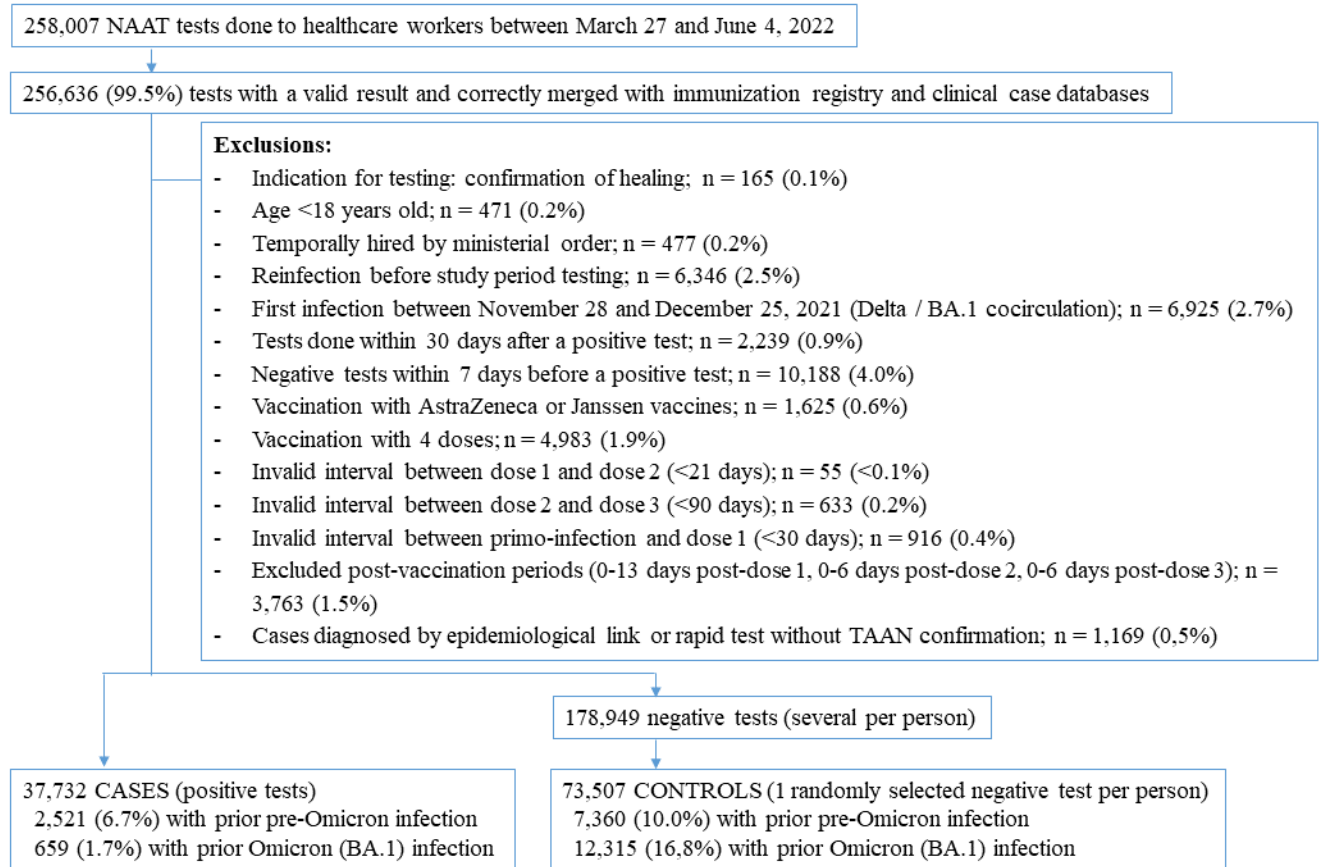

Abbreviations: NAAT, nucleic acid amplification test
